# Supplementary material for: Dual Oxidase Maturation Factor 1 Positively Regulates RANKL-Induced Osteoclastogenesis via Activating Reactive Oxygen Species and TRAF6-Mediated Signaling
Source: MDPI journal article supplement (doi:10.3390/ijms21176416), 2020-09-03
Supplement: s1 [file s1]

Supplementary Figure legends

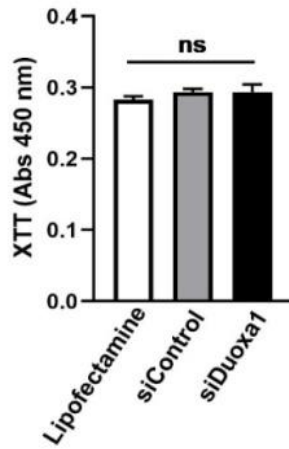

**Supplementary Figure 1:** BMMs were transfected with siControl or siDuoxa1 using lipofectamin3000, and cultured in the presence of M-CSF (30 ng/mL) for 3 days. Cell viability was analyzed by an XTT assay.

**A**

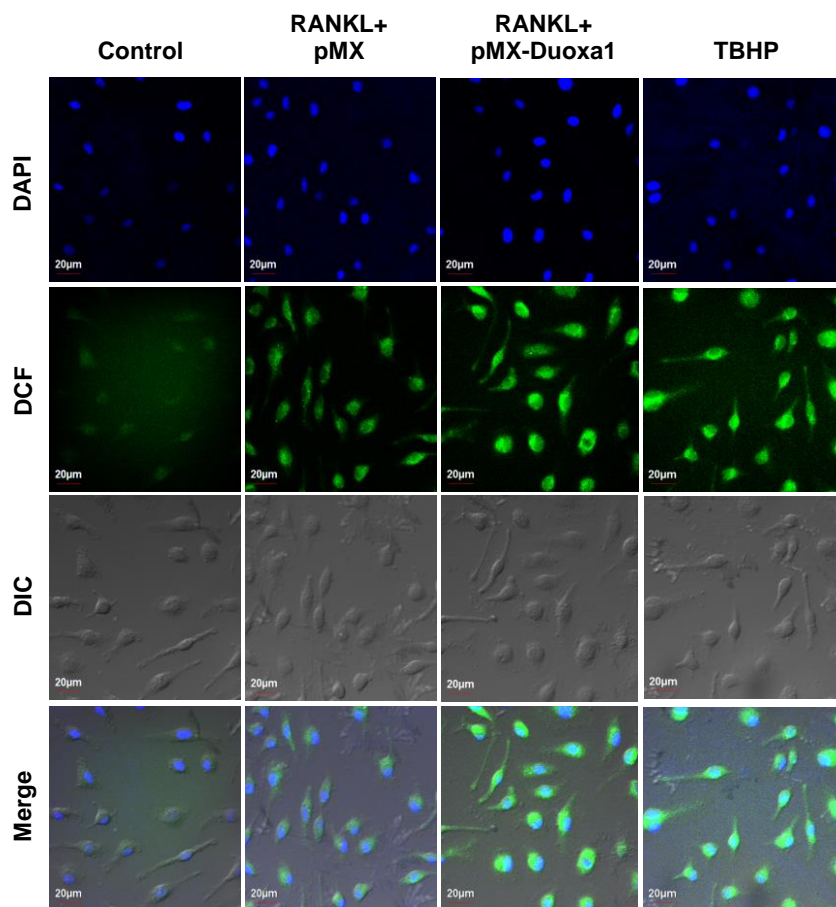

**B**

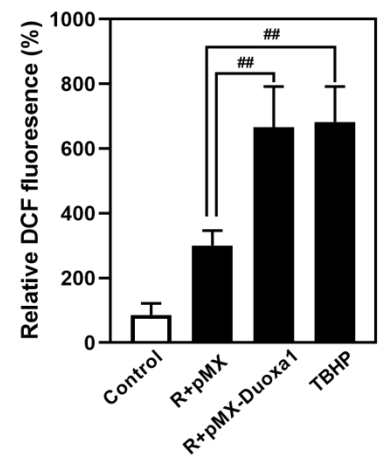

**Supplementary Figure 2:** Overexpression of Duoxa1 increases RANKL-induced ROS production. **(A)** BMMs transduced with the pMX or pMX-Duoxa1 retrovirus were treated with RANKL for 10 min, and

ROS levels were determined by DCF fluorescence detection using a confocal laser-scanning microscope. **(B)** The DCF fluorescence intensity was confirmed for the region of interest (ROI). Results are representative of at least 3 independent sets of similar experiments. TBHP was used as the standard control for ROS production. Data are presented as the mean  $\pm$  SD of three independent experiments. *##p* < 0.01 versus the positive pMX.
